# Supplementary material
Source: HighWire-hosted journal article supplement (https://bmjopenquality.bmj.com/content/12/2/e002202)

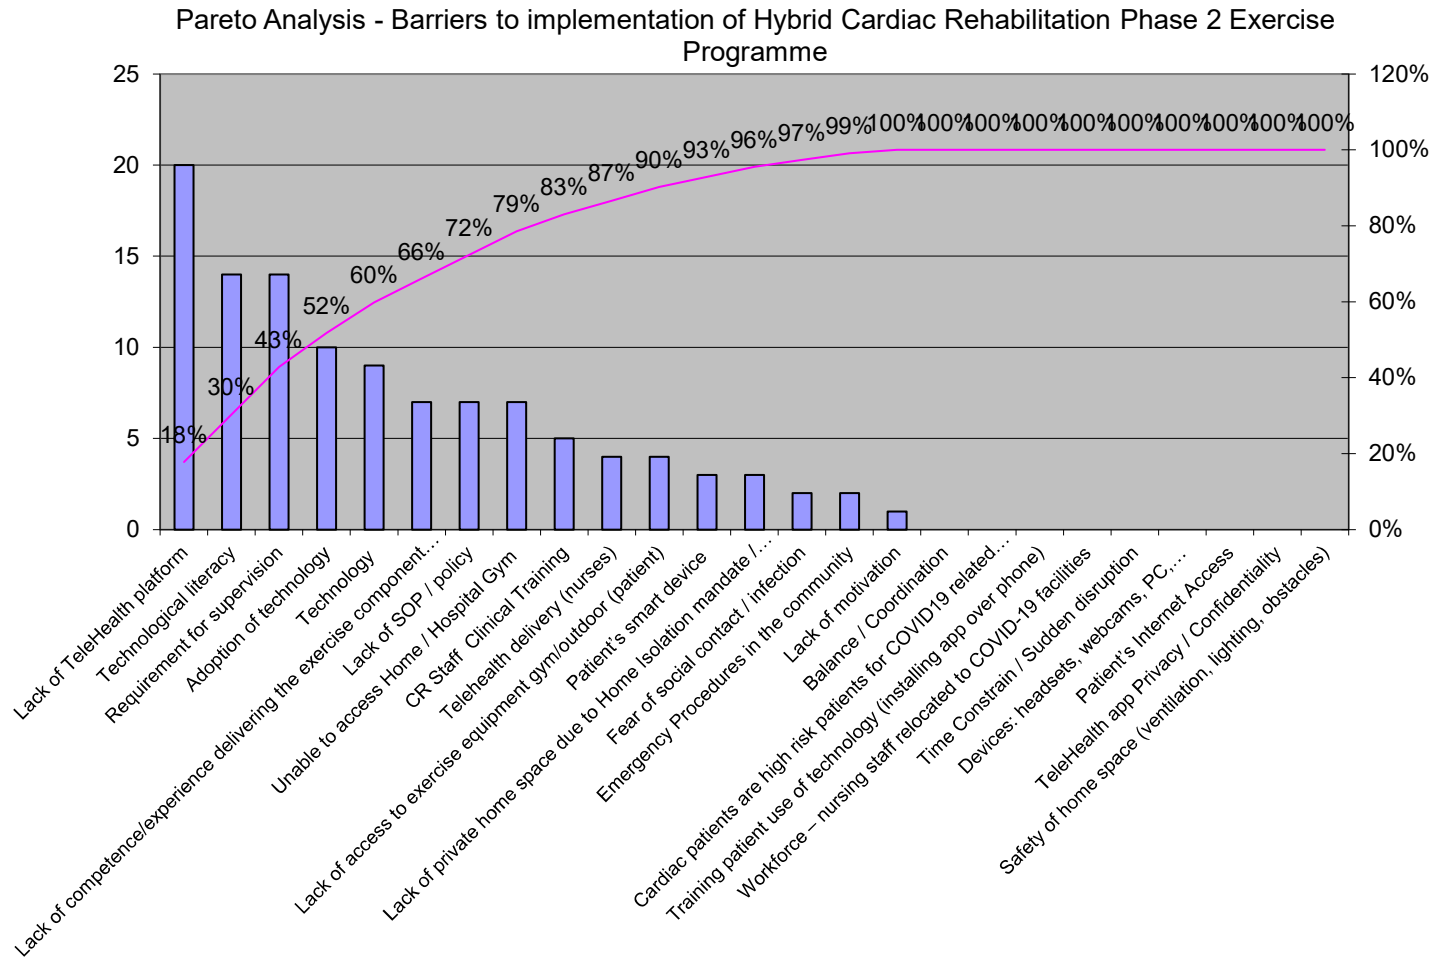

## Remote Physical Activity Counselling Guiding Script

1. Identify myself
2. Explain to the patient the reason for this call: state objectives and outline of PA counselling
3. Explore patient's current situation:
  - "Can you tell me a little bit about in which ways you are staying active at home?"
  - Quantify IPAQ: How much activity: days and minutes per day as well as intensity (light/moderate/vigorous)
  - Describe the form or mode of activity.
  - Does he have exercise equipment at home? YES / NO, what equipment? If YES explore if use of equipment is correct or maximize and advice as possible based on the Exercise Card.
  - How much sedentary time: typically remind him/her of importance of breaking sedentary time.
4. Patient perceptions:
  - What does he think about his current levels of activity? Are they enough?
5. Counselling:
  - If ACTIVE:
    1. "That is great,... and How are you feeling about it?" Generate change talk, assess consistency, motivation, future potential issues, etc...
  - If NOT ACTIVE:
    1. Explore barriers: motivational vs practical (i.e lack of equipment)
    2. What is stopping him/her from being active?
    3. What things/ways does the patient think could help him/her start or increase his/her exercise levels?
    4. Explore his awareness of consequences of Inactivity for his/her Cardiovascular Health
    5. Work and explore with patient towards 5W of Exercising at Home:
      1. Why should he/her Exercise?
      2. What Exercise can he/she do?
      3. When to Exercise?
      4. Where to Exercise?
      5. Who can help him/her exercise?
    6. Explore readiness: regarding the 5W plan above: is the patient ready to commit to an immediate Action Step (i.e working out that same day or next)
    7. Is it possible to get him/her to generate a short term weekly SMART goal? i.e To exercise 2 times a week for 45 min at moderate intensity following the Cardiac Rehab Video.
    8. Record this goal on the Progress Note so whoever counsels him/her next can refer back to it
6. Remind patient of basic precautions and considerations
  - Monitor Signs and Symptoms
  - Warm-up and cool-down
  - Manage own intensity
  - Adherence to medications
  - Refraining from smoking
7. Follow-Up: When will we call the patient in 2 weeks? Record on the progress note.
1. Document Counselling / Assessment notes on Cerner

## Reasons Not Eligible

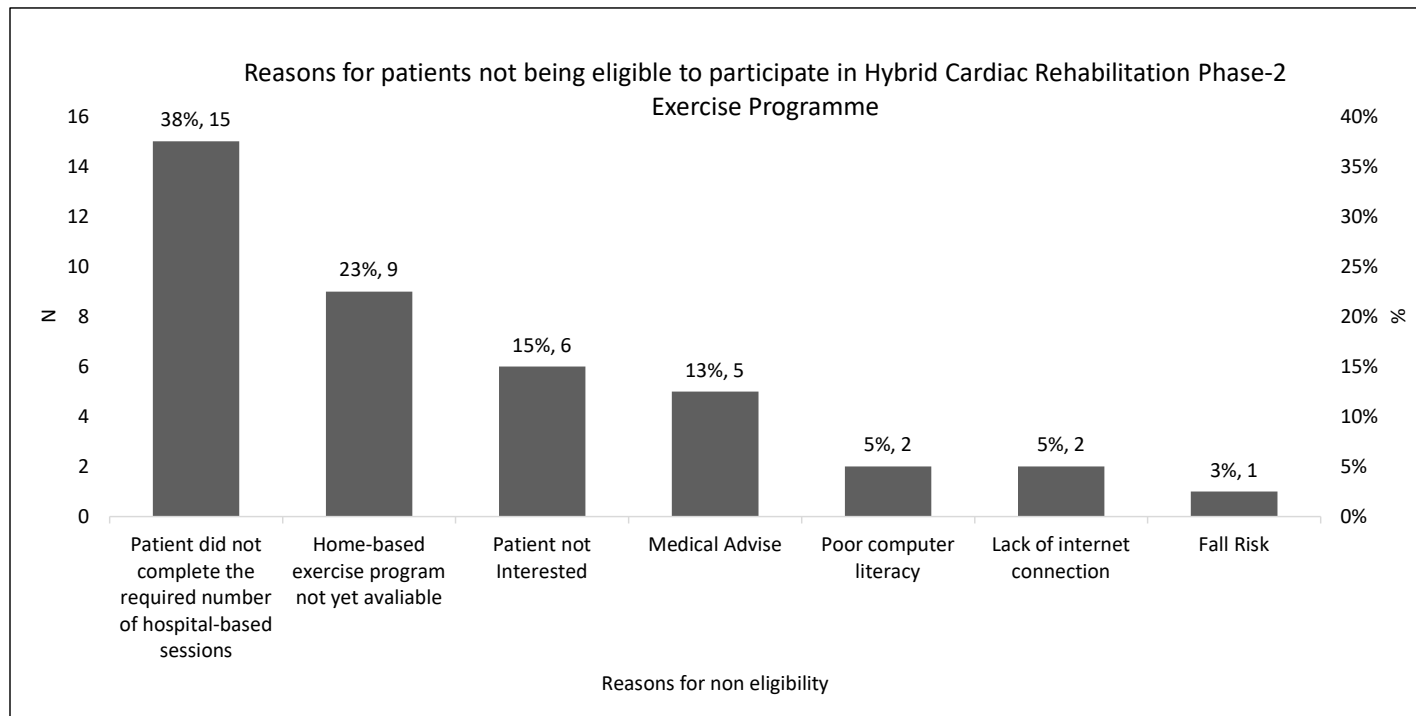

## Reasons Not Enrolled

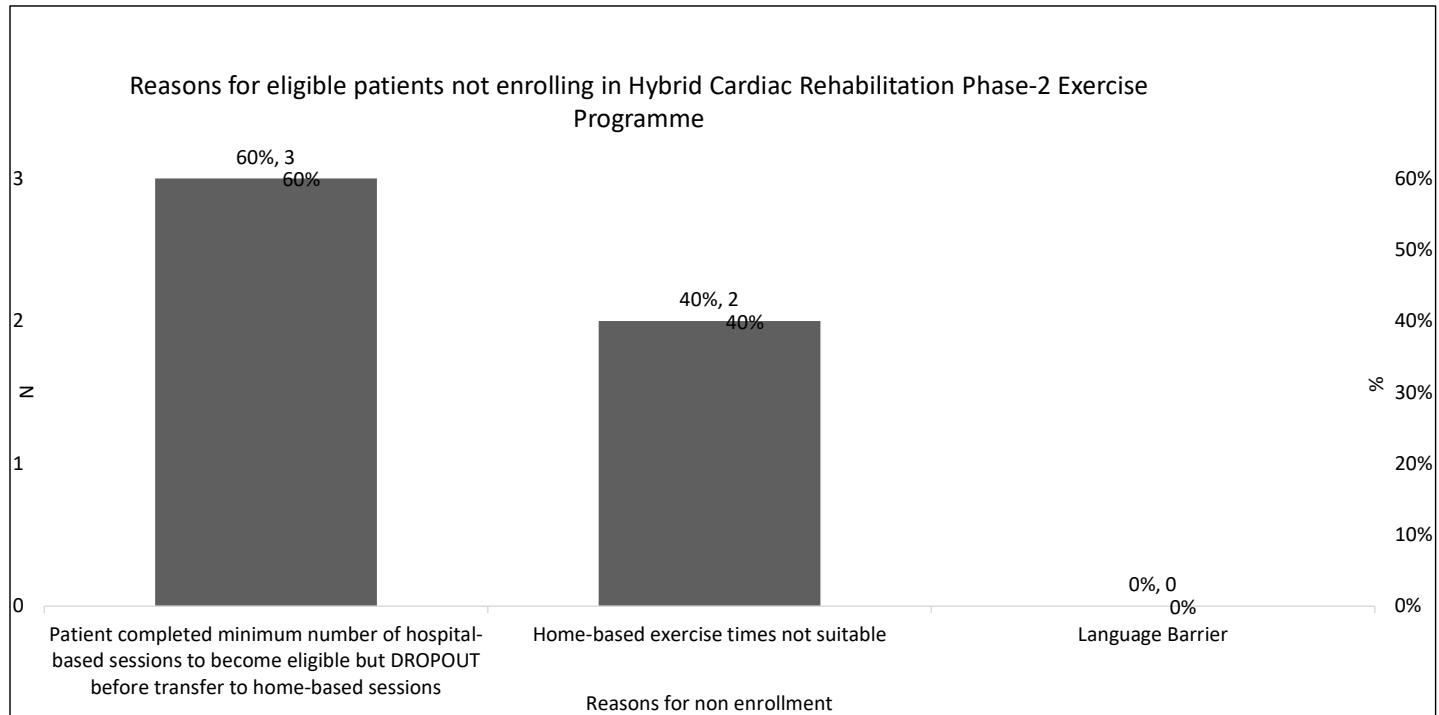

## Secondary Outcome: Exercise Capacity Improvement

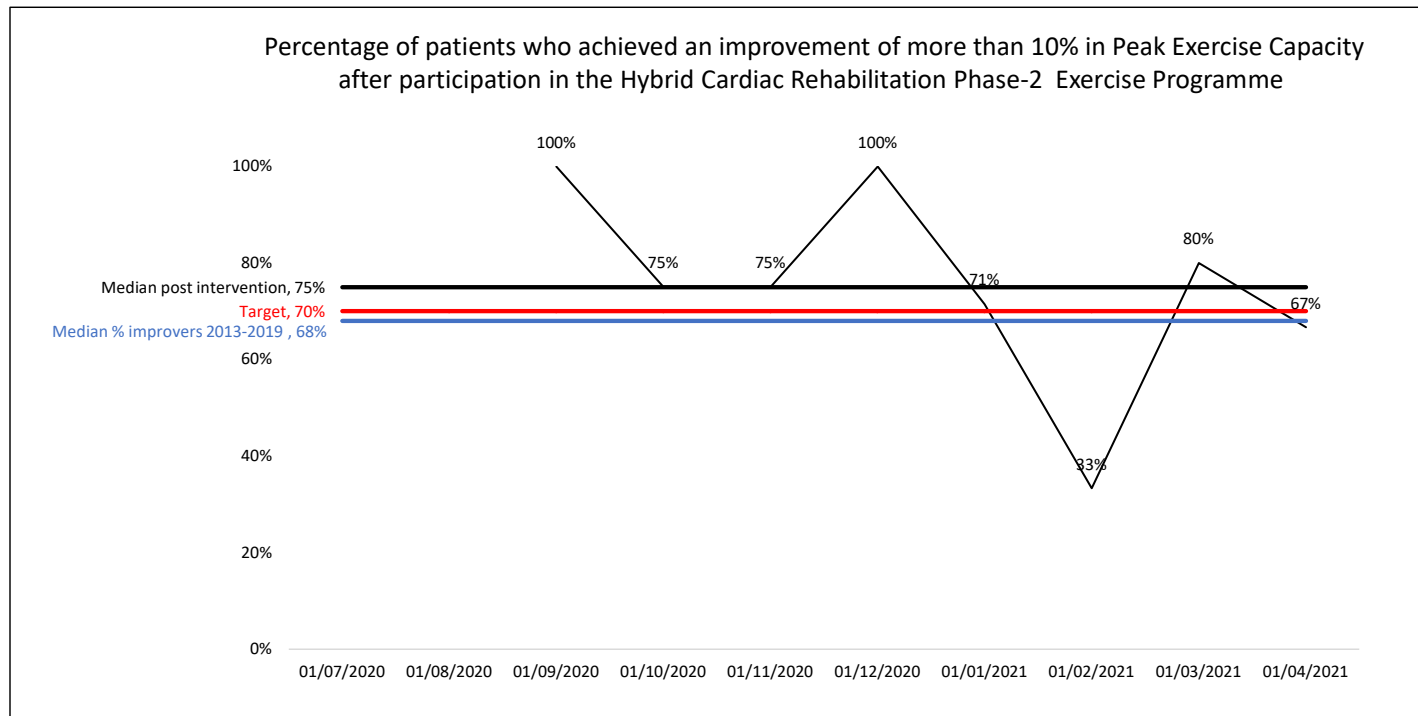

## Process Measure: Timing of Transfer

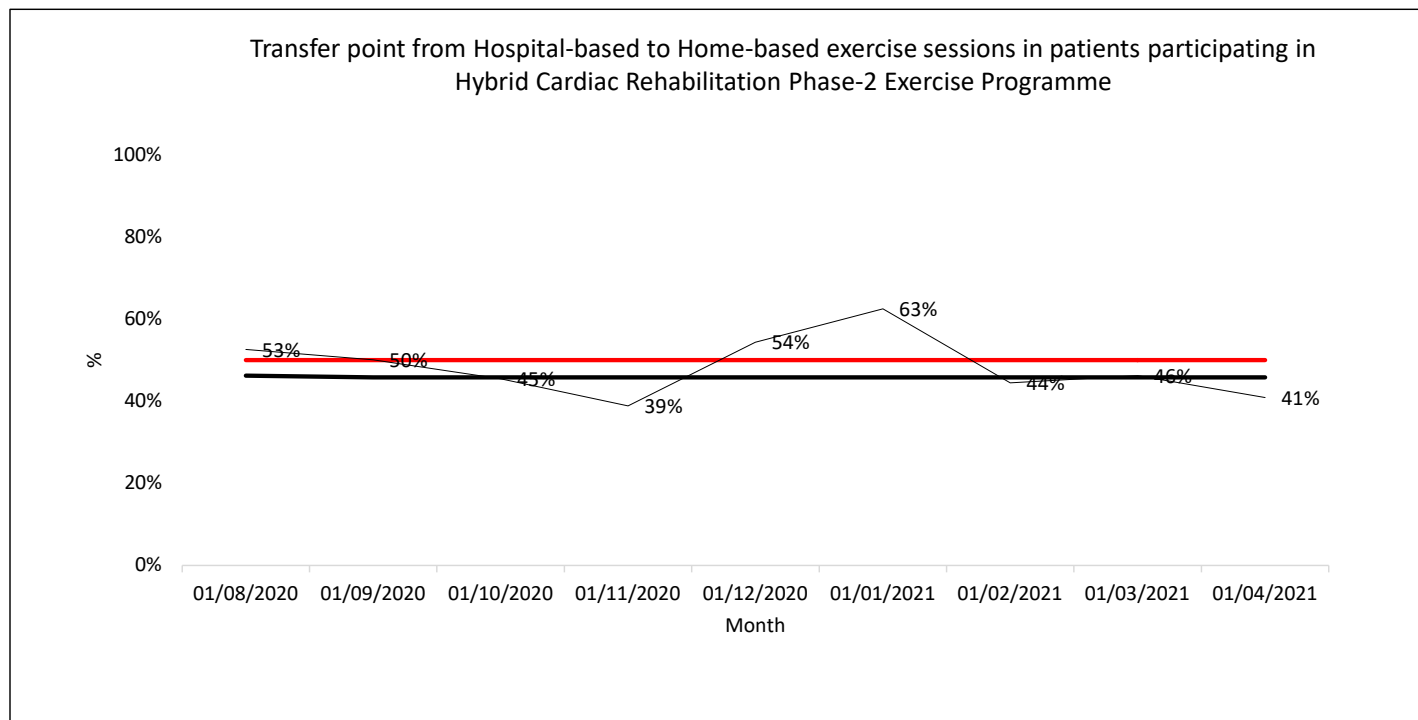

## Balance Measure: Cost of Consumables

(Total Net Estimated Saving = 6889QAR  $\approx$  135 QAR/per patient enrolled)

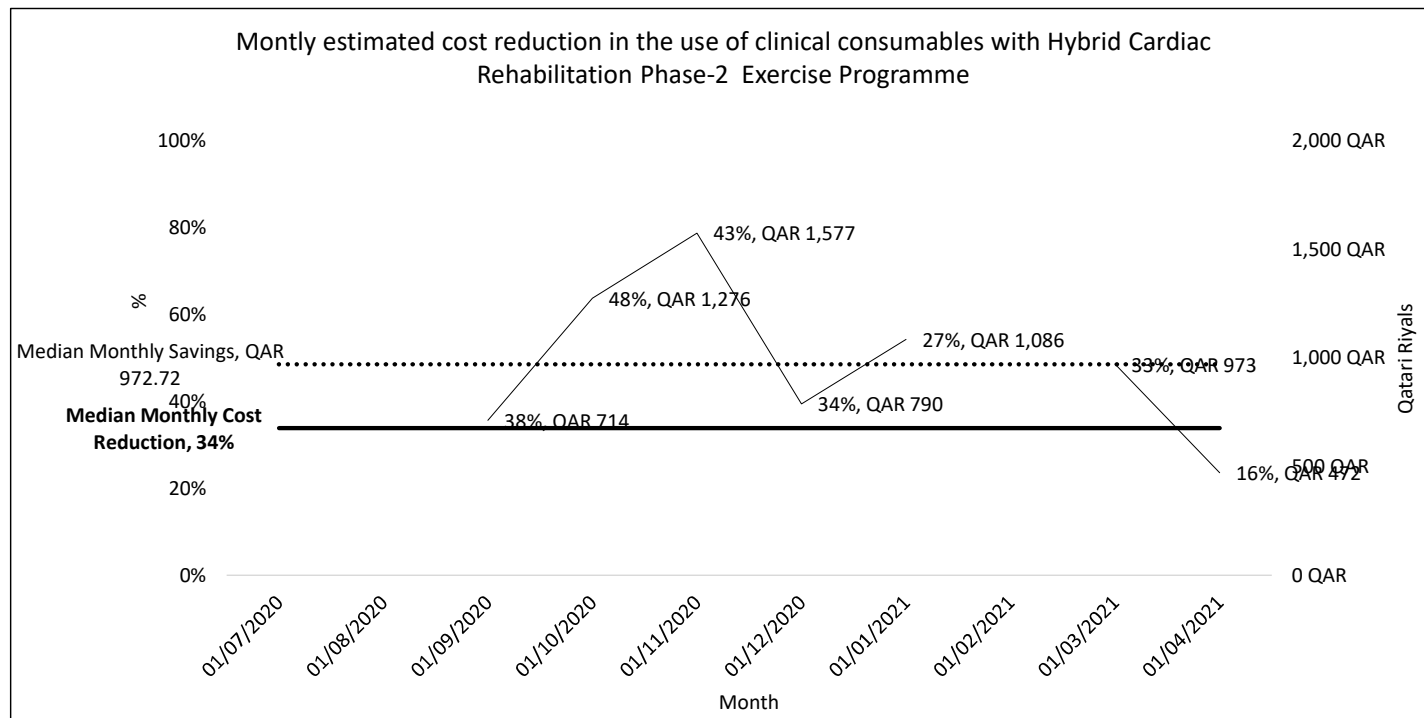

## Balance Measure: Patient Satisfaction

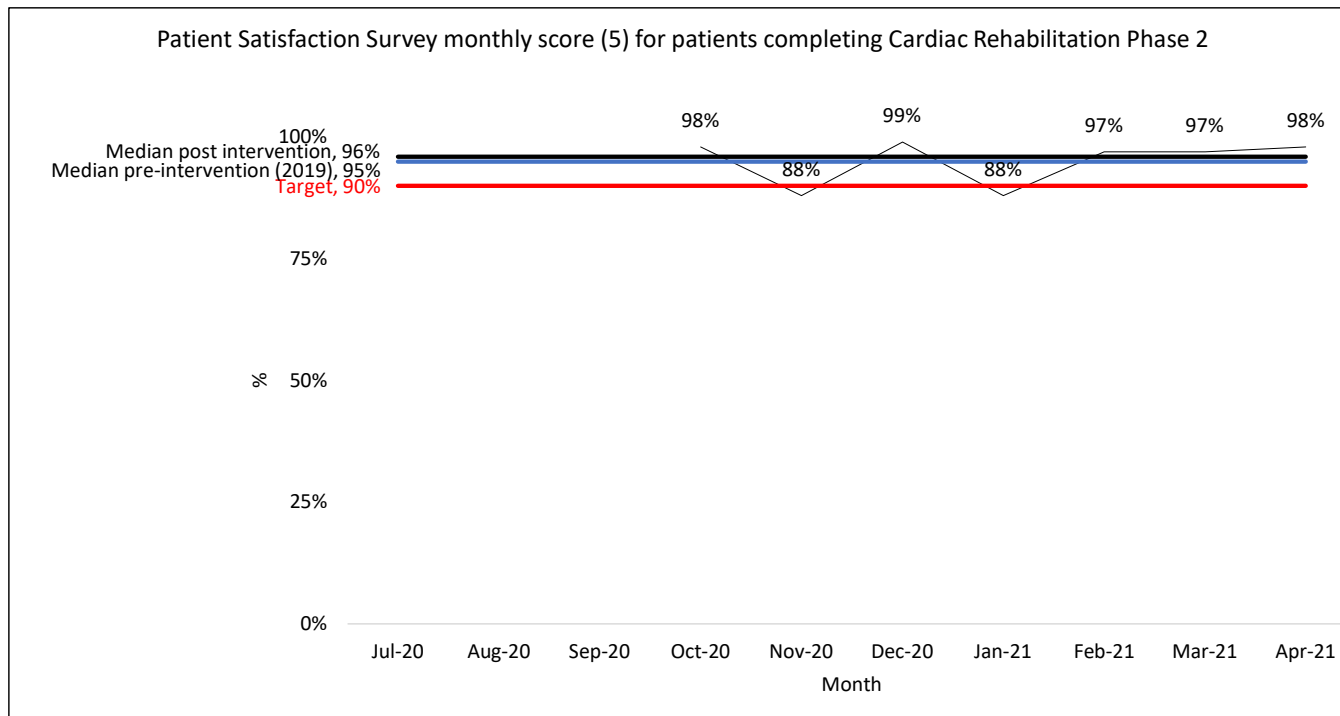



## Balance Measure: Adverse Events

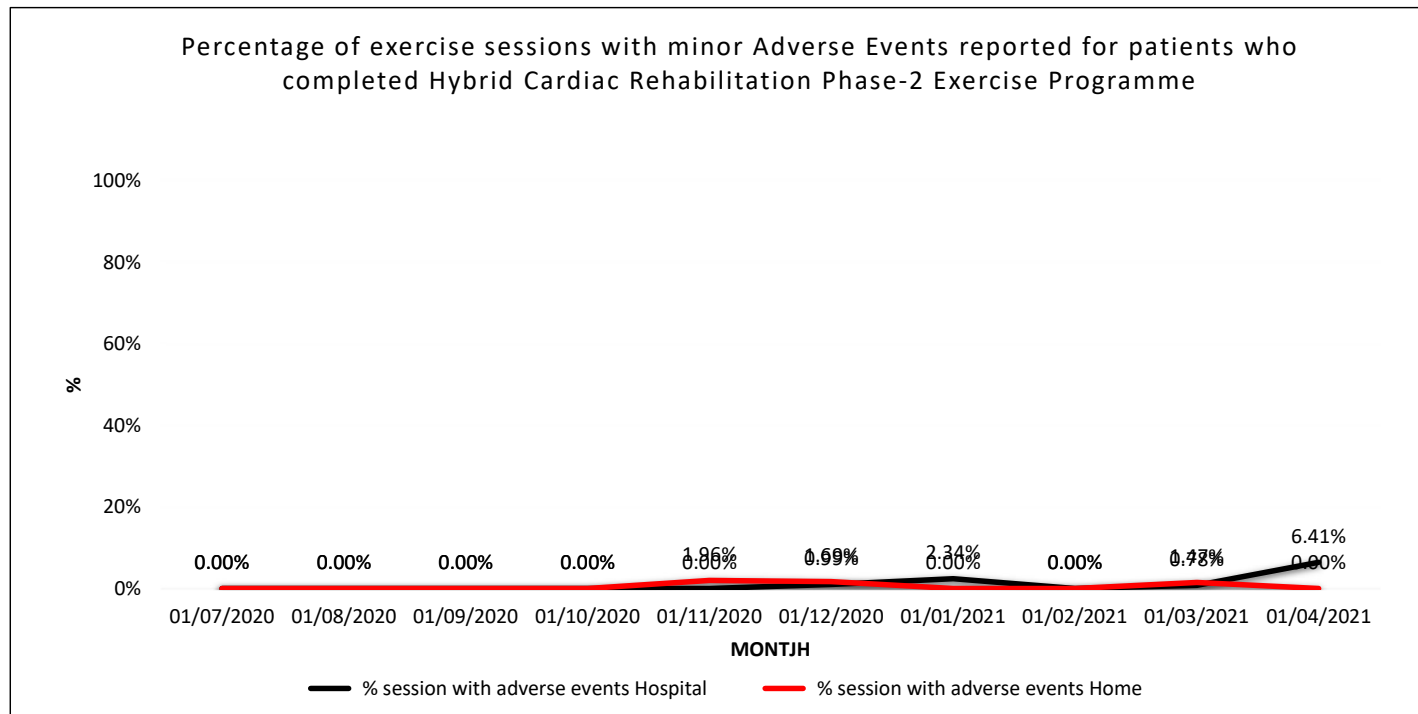

## Balance Measure: Adverse Events

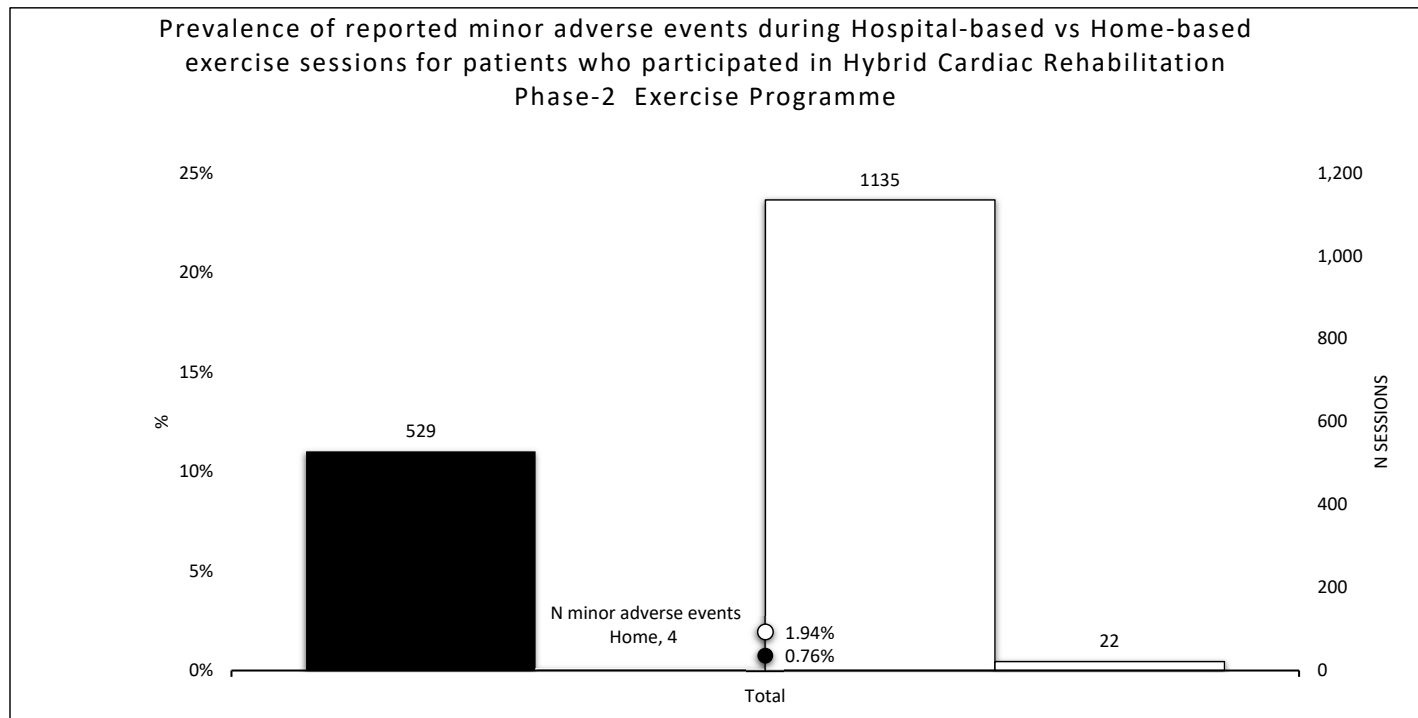

Supplement: inline-supplementary-material-1 [file inline-supplementary-material-1.pdf]
