# Supplementary material
Source: HighWire-hosted journal article supplement (https://bmjopenquality.bmj.com/content/12/2/e002202)
Supplement: inline-supplementary-material-2 [file inline-supplementary-material-2.pdf]

**APPENDIX A - TRANSFER TO CRP2 HOME-BASED EXERCISE SESSIONS CHECKLIST****PATIENT DETAILS**

HC# \_\_\_\_\_ Name: \_\_\_\_\_ Risk Cat: \_\_\_\_\_ Current Group: \_\_\_\_\_

**REVIEWER**

Name: \_\_\_\_\_ Corporation Number \_\_\_\_\_

**TRANSFER DETAILS:**

1. Number of completed sessions:
2. Proposed Transfer date:
3. Transfer to Program Type:
  - a.  Home Unsupervised and Monitored by remote ECG telemetry
  - b.  Home Supervised via Telehealth platform and Monitored by remote ECG telemetry
  - c.  Home Supervised via Telehealth platform and Monitored by RPE-only
4. Timing:
  - a.  MW0730  MW0900  MW1030  MW1200  MW1330  MW1600  MW1730
  - b.  STT0730  STT0900  STT1030  STT1200  STT1330  STT1600  STT1730
5. Location:  Home  Work  Home Gym  Work Gym  
*(Public areas such as parks or public gyms are not allowed)*
6. Equipment available:  None  Treadmill  Cycle  Other:

**PATIENTS CLINICAL STATUS:**

1. Eligible to exercise without ECG monitoring?  Yes  No
  - a. No History of Cardiac Arrest outside the context of ACS
  - b. No history of v-tach or other life-threatening arrhythmia
  - c. LVEF  $\geq$  30%
  - d. No cardiac symptoms
2. Eligible for Home Program?  Yes  No
  - a. No complex arrhythmias at rest or exercise
  - b. No significant ST depression / ECG changes on exercise
  - c. No other investigations pending (i.e Holter ECG, Labs,...)
  - d. No Falls Risk identified
3. Is the patient Diabetic?  Yes  No
  - a. Is his/her blood sugar well controlled?  Yes  No
  - b. Any episodes of exercise related hypo/hyper glycaemia reported?  Yes  No
  - c. Does the patient have a Glucometer at home?  Yes  No
  - d. Comments: \_\_\_\_\_
4. Is the patient Hypertensive?  Yes  No
  - a. Is his/her BP well controlled?  Yes  No
  - b. Any episodes of exercise related hypo/hypertensive responses?  Yes  No
  - c. Does the patient have a Blood Pressure machine at home?  Yes  No
  - d. Comments: \_\_\_\_\_
5. Any recent changes to related interventions?
  - a. Recent change in medications  Yes  No

**TRANSFER DECISION AT TEAM CONFERENCE (Date \_\_\_\_\_ Physician Present \_\_\_\_\_)**

- APPROVED
- DENIED → Reason: \_\_\_\_\_
- POSTPONED → Plan: \_\_\_\_\_

**COMPLETING THE TRANSFER:**

1. Has the patient been thoroughly explained the HYCRP2-EP requirements?  Yes  No
2. Has the patient agreed to the transfer under the above conditions?  Yes  No
3. Has Telehealth application been installed?  Yes  No
4. Has remote ECG telemetry unit been assigned & checked for correct functioning?  Yes  No
5. Contact information:
  - Zone#: \_\_\_\_\_ Street#: \_\_\_\_\_ Building#: \_\_\_\_\_ Apt#: \_\_\_\_\_
  - Phone#: \_\_\_\_\_ Email: \_\_\_\_\_
6. Progress Note on Electronic Medical Record system completed:  Yes  No
